# Supplementary material for: High-Quality Genome of the Medicinal Plant Strobilanthes cusia Provides Insights Into the Biosynthesis of Indole Alkaloids
Source: Front Plant Sci. 2021 Sep 30;12:742420. doi: 10.3389/fpls.2021.742420 (PMC8515051; doi:10.3389/fpls.2021.742420)
Supplement: Supplementary file 2 [file Data_Sheet_2.xlsx]

## Sheet: Sheet1
Supplementary Table 16 List of Strobilanthes-specific genes (SSGs)
Gene accession	Chromosome name	Gene start	Gene end	Strand	% GC content	Gene length (bp)	Subcellular locations	Origination mechanism
ML00003	Chr04	23194967	23195784	+	0.3191	818	extracellular space	Gene duplication:ML22241
ML00013	Chr04	23050347	23054983	-	0.3739	4637	nucleus	Gene duplication:ML05823
ML00157	Chr04	21237371	21238246	+	0.5651	876	nucleus
ML00202	Chr04	20786164	20786767	+	0.4123	604	nucleus
ML00216	Chr04	20608280	20608809	+	0.3811	530	extracellular space
ML00329	Chr15	18613273	18613611	+	0.469	339	nucleus
ML00344	Chr15	17877113	17877735	-	0.4607	623	extracellular space
ML00497	Chr01	60880773	60887910	-	0.3289	7138	nucleus	Gene duplication:ML16504
ML00525	Chr08	23874156	23875715	-	0.3801	1560	extracellular space
ML00562	Chr08	23444542	23446656	-	0.4132	2115	nucleus	Gene duplication:ML20652
ML00590	Chr08	23082824	23083948	-	0.3493	1125	chloroplast	Gene duplication:ML32448
ML00629	Chr08	22399196	22415533	-	0.3565	16338	nucleus
ML00690	Chr08	21305714	21307576	+	0.3849	1863	nucleus	Gene duplication:ML31515
ML00790	Chr08	19692802	19693305	-	0.4405	504	extracellular space
ML00807	Chr08	19306318	19308075	-	0.3618	1758	chloroplast	Gene duplication:ML21171
ML00897	Chr08	17849469	17850008	+	0.5352	540	extracellular space
ML00933	Chr08	17201803	17204547	+	0.4215	2745	nucleus
ML00947	Chr08	16972873	16973638	+	0.4112	766	nucleus
ML00988	Chr08	15500507	15500827	-	0.5296	321	nucleus
ML00989	Chr08	15493019	15493339	-	0.5296	321	nucleus
ML01105	Chr08	12514526	12514774	-	0.5181	249	chloroplast
ML01112	Chr08	12212220	12213484	-	0.3439	1265	endomembrane system	Gene duplication:ML06062
ML01123	Chr08	12070545	12076840	-	0.3185	6296	nucleus	Gene duplication:ML12191
ML01149	Chr08	11249989	11251762	-	0.4273	1774	nucleus	Gene duplication:ML12628
ML01211	Chr08	8634781	8636541	-	0.3867	1761	nucleus	Gene duplication:ML13174
ML01213	Chr08	8626561	8630389	-	0.4006	3829	chloroplast	Gene duplication:ML20894
ML01248	Chr08	7134461	7138731	+	0.3952	4271	nucleus
ML01257	Chr08	6808094	6809495	+	0.373	1402	nucleus	Gene duplication:ML23934
ML01310	Chr08	3783290	3786901	+	0.3037	3612	nucleus
ML01330	Chr08	3251143	3252006	+	0.5752	864	nucleus	Gene duplication:ML14428
ML01332	Chr08	3149344	3150816	+	0.3781	1473	nucleus	Gene duplication:ML03429
ML01371	Chr02	1531019	1531639	-	0.5781	621	nucleus
ML01376	Chr02	1237167	1237978	+	0.4002	812	chloroplast
ML01456	Chr08	49174303	49176704	+	0.3826	2402	nucleus
ML01476	Chr08	48119714	48125856	+	0.3143	6143	chloroplast
ML01492	Chr08	47219753	47223247	+	0.3393	3495	chloroplast
ML01513	Chr08	45750145	45750690	+	0.5311	546	extracellular space
ML01545	Chr08	44278718	44281171	-	0.3635	2454	plasma membrane
ML01611	Chr01	5001431	5004848	-	0.431	3418	nucleus
ML01612	Chr01	5004388	5004885	-	0.5843	498	mitochondrion
ML01718	Chr01	7105563	7107853	+	0.3357	2291	nucleus
ML01739	Chr01	7565694	7568736	-	0.4111	3043	plasma membrane
ML01770	Chr01	8586582	8587016	-	0.6299	435	nucleus
ML01801	Chr01	9389952	9392554	+	0.3185	2603	nucleus
ML01814	Chr01	9553020	9556026	+	0.3814	3007	nucleus
ML01818	Chr01	9576552	9577629	-	0.4304	1078	extracellular space	Gene duplication:ML01822
ML01879	Chr01	10665607	10678531	-	0.358	12925	chloroplast
ML01907	Chr01	11206164	11208113	+	0.3436	1950	endomembrane system
ML01913	Chr01	11382552	11382899	-	0.5603	348	extracellular space
ML01920	Chr01	11513937	11515417	-	0.447	1481	extracellular space
ML02015	Chr01	14409482	14409760	+	0.4373	279	organelle membrane
ML02018	Chr01	14547235	14548508	+	0.3948	1274	nucleus
ML02019	Chr01	14628506	14629669	+	0.4012	1164	nucleus
ML02077	Chr01	16472705	16472929	+	0.4711	225	chloroplast
ML02123	Chr01	17508645	17514631	+	0.308	5987	nucleus
ML02146	Chr01	18507589	18513694	-	0.3511	6106	chloroplast
ML02147	Chr01	18509149	18509508	+	0.4611	360	nucleus
ML02152	Chr01	18645845	18646853	+	0.3518	1009	organelle membrane
ML02193	Chr01	20326363	20327484	+	0.3681	1122	chloroplast	Gene duplication:ML27351
ML02204	Chr01	20805706	20805933	-	0.5921	228	extracellular space
ML02217	Chr01	21196701	21197032	-	0.5241	332	extracellular space
ML02221	Chr01	21501954	21502954	-	0.3447	1001	nucleus	Gene duplication:ML01221
ML02230	Chr01	21678645	21680694	-	0.3439	2050	extracellular space
ML02231	Chr01	21806876	21809398	+	0.4015	2523	extracellular space
ML02240	Chr01	22170588	22172393	+	0.397	1806	nucleus
ML02343	Chr01	29357496	29359610	-	0.3669	2115	chloroplast
ML02346	Chr01	29927292	29928170	-	0.3242	879	chloroplast
ML02352	Chr01	30134220	30135405	+	0.4157	1186	nucleus
ML02414	Chr01	36164973	36165245	+	0.5018	273	nucleus
ML02452	Chr01	38870432	38872985	+	0.3442	2554	nucleus
ML02498	Chr01	41376482	41377353	-	0.4255	872	organelle membrane
ML02563	Chr01	43346002	43346361	+	0.3694	360	chloroplast
ML02583	Chr01	43844220	43845291	+	0.4767	1072	chloroplast thylakoid lumen
ML02587	Chr01	44065220	44065516	-	0.3838	297	nucleus
ML02598	Chr01	44435316	44436195	-	0.5261	880	nucleus
ML02615	Chr01	44810588	44813504	-	0.3421	2917	chloroplast	Gene duplication:ML02399
ML02622	Chr01	37634852	37635293	+	0.4095	442	chloroplast
ML02744	Chr01	47997811	48000748	+	0.2675	2938	extracellular space
ML02777	Chr01	48701129	48709457	-	0.3419	8329	nucleus	Gene duplication:ML15901
ML02945	Chr01	52350342	52350560	-	0.4429	219	extracellular space
ML03027	Chr01	53978294	53979754	-	0.3457	1461	organelle membrane
ML03128	Chr03	48226924	48227401	+	0.3619	478	nucleus	Gene duplication:ML02393
ML03135	Chr03	47884341	47887089	+	0.3412	2749	endomembrane system	Gene duplication:ML08785
ML03296	Chr03	38548681	38550588	-	0.3805	1908	nucleus
ML03314	Chr03	39117384	39120990	-	0.3102	3607	chloroplast
ML03332	Chr03	36265355	36267713	+	0.4824	2359	nucleus	Gene duplication:ML04425
ML03357	Chr03	35572009	35576231	+	0.3026	4223	chloroplast
ML03478	Chr03	32567709	32569803	+	0.369	2095	nucleus	Gene duplication:ML13667
ML03483	Chr03	32402371	32402862	+	0.3963	492	nucleus	Gene duplication:ML03473
ML03492	Chr03	32108070	32110070	-	0.3548	2001	chloroplast
ML03615	Chr03	29579870	29580319	-	0.4467	450	chloroplast
ML03648	Chr03	29004957	29005692	-	0.4293	736	chloroplast
ML03703	Chr03	28271978	28273170	+	0.4208	1193	organelle membrane
ML03720	Chr03	27939436	27940833	+	0.427	1398	nucleus
ML03750	Chr03	27440311	27443034	+	0.3488	2724	nucleus	Gene duplication:ML24608
ML03751	Chr03	27414789	27417513	+	0.3483	2725	nucleus	Gene duplication:ML24608
ML03762	Chr03	27272066	27272350	-	0.4807	285	extracellular space	Gene duplication:ML10143
ML03789	Chr03	26889548	26889847	-	0.4567	300	nucleus
ML03812	Chr03	26479963	26481435	+	0.296	1473	extracellular space
ML03813	Chr03	26445342	26446043	+	0.3561	702	extracellular space
ML03945	Chr03	24090578	24091015	-	0.4977	438	chloroplast
ML03999	Chr03	23013149	23013442	-	0.2891	294	extracellular space	Gene duplication:ML01614
ML04003	Chr03	22918142	22918626	-	0.4474	485	nucleus
ML04044	Chr03	22419560	22421011	-	0.3891	1452	chloroplast
ML04051	Chr03	22355654	22356069	+	0.387	416	chloroplast
ML04070	Chr03	21928762	21929130	-	0.4011	369	chloroplast
ML04212	Chr03	19519200	19522388	+	0.3797	3189	nucleus
ML04239	Chr03	19096525	19096755	-	0.4719	231	chloroplast
ML04262	Chr03	18890262	18891960	+	0.3796	1699	nucleus
ML04282	Chr03	18663906	18664609	+	0.4986	704	nucleus	Gene duplication:ML24635
ML04310	Chr03	17909477	17912276	-	0.3986	2800	chloroplast
ML04318	Chr03	17716172	17716744	+	0.4311	573	chloroplast
ML04400	Chr03	13117934	13123758	-	0.3367	5825	nucleus
ML04445	Chr03	12074749	12076148	+	0.3664	1400	chloroplast
ML04454	Chr03	11849507	11852867	+	0.3401	3361	nucleus
ML04466	Chr03	11663452	11663821	-	0.4324	370	extracellular space
ML04475	Chr03	11498464	11498667	-	0.6029	204	extracellular space
ML04529	Chr03	10546188	10546949	+	0.3609	762	nucleus
ML04560	Chr03	9610121	9615244	-	0.3331	5124	nucleus
ML04564	Chr03	9487039	9487692	+	0.3165	654	nucleus
ML04568	Chr03	9354307	9354600	+	0.5884	294	extracellular space
ML04609	Chr03	7921106	7922101	-	0.4829	996	extracellular space
ML04743	Chr03	5510797	5512600	+	0.357	1804	chloroplast	Gene duplication:ML20222
ML04744	Chr03	5509969	5510712	+	0.336	744	chloroplast	Gene duplication:ML20222
ML04745	Chr03	5507986	5509884	+	0.3955	1899	chloroplast
ML04746	Chr03	5508174	5508419	-	0.5528	246	extracellular space
ML04780	Chr03	4929956	4935290	-	0.3584	5335	nucleus	Gene duplication:ML20222
ML04788	Chr03	4785174	4786244	+	0.3427	1071	nucleus
ML04789	Chr03	4782410	4785384	+	0.3603	2975	endomembrane system
ML04791	Chr03	4750813	4751883	+	0.3427	1071	nucleus
ML04792	Chr03	4748049	4751023	+	0.36	2975	endomembrane system
ML04794	Chr03	4716330	4717623	+	0.33	1294	nucleus
ML04819	Chr05	44529051	44529374	+	0.6605	324	nucleus
ML04839	Chr03	54794163	54794489	+	0.4128	327	endomembrane system
ML04842	Chr03	54924027	54924726	-	0.3586	700	endomembrane system	Gene duplication:ML13610
ML04849	Chr03	55808034	55808724	-	0.4732	691	extracellular space
ML04869	Chr03	57485697	57486872	+	0.4311	1176	plasma membrane
ML04871	Chr03	57495829	57500725	-	0.3982	4897	nucleus	Gene duplication:ML05823
ML04876	Chr03	57870133	57873142	-	0.3731	3010	chloroplast thylakoid lumen
ML04881	Chr03	58156155	58156608	-	0.4295	454	extracellular space
ML04906	Chr03	59547118	59547931	+	0.4496	814	nucleus
ML04923	Chr03	60211868	60214156	-	0.3102	2289	chloroplast	Gene duplication:ML12229
ML04942	Chr03	62033849	62034058	+	0.5667	210	nucleus
ML04972	Chr03	63894263	63898036	+	0.3206	3774	nucleus
ML04976	Chr03	63913103	63914331	-	0.4443	1229	nucleus	Gene duplication:ML26487
ML04990	Chr03	64740205	64740770	-	0.371	566	chloroplast
ML05050	Chr03	67906196	67907943	-	0.3741	1748	nucleus	Gene duplication:ML24543
ML05057	Chr03	68529510	68534892	+	0.3708	5383	chloroplast
ML05064	Chr03	68640257	68640653	+	0.4534	397	endomembrane system
ML05067	Chr03	68889090	68890622	+	0.3731	1533	nucleus	Gene duplication:ML10631
ML05068	Chr03	68906847	68908863	-	0.4363	2017	nucleus	Gene duplication:ML10169
ML05114	Chr03	70454415	70455656	-	0.401	1242	nucleus
ML05145	Chr03	72320532	72325378	-	0.3722	4847	nucleus
ML05154	Chr03	72552254	72552565	+	0.4199	312	organelle membrane
ML05166	Chr03	72891792	72892160	-	0.5393	369	extracellular space
ML05180	Chr03	73282258	73286676	+	0.3166	4419	nucleus	Gene duplication:ML08096
ML05193	Chr03	73624249	73625818	-	0.4178	1570	nucleus
ML05213	Chr03	74120964	74121751	+	0.4442	788	extracellular space	Gene duplication:ML05218
ML05215	Chr03	74167239	74168052	-	0.441	814	extracellular space	Gene duplication:ML05218
ML05250	Chr03	75574591	75574797	-	0.5266	207	mitochondrion	Gene duplication:ML05444
ML05255	Chr03	75874005	75874433	-	0.4592	429	endomembrane system	Gene duplication:ML13566
ML05259	Chr03	76047218	76047526	+	0.6117	309	nucleus
ML05263	Chr03	76112166	76112876	+	0.3615	711	nucleus
ML05308	Chr04	3545964	3546676	+	0.6494	713	mitochondrion
ML05309	Chr04	3546089	3546766	-	0.6313	678	nucleus
ML05342	Chr04	4118949	4120318	+	0.3416	1370	chloroplast	Gene duplication:ML05343
ML05344	Chr04	4140343	4144445	-	0.3341	4103	endomembrane system
ML05345	Chr04	4141703	4144343	-	0.3143	2641	chloroplast	Gene duplication:ML05346
ML05349	Chr04	4220720	4222894	+	0.3614	2175	nucleus	Gene duplication:ML05346
ML05350	Chr04	4226332	4228495	+	0.3387	2164	chloroplast	Gene duplication:ML05343
ML05390	Chr04	5090903	5091475	+	0.3822	573	organelle membrane
ML05420	Chr04	5672267	5673658	-	0.375	1392	extracellular space
ML05456	Chr04	6334053	6335876	-	0.3701	1824	nucleus
ML05457	Chr04	6335296	6335622	+	0.4526	327	nucleus
ML05478	Chr04	6716795	6717085	-	0.4845	291	chloroplast
ML05506	Chr04	7342054	7343068	+	0.3616	1015	nucleus	Gene duplication:ML03785
ML05510	Chr04	7390373	7391005	+	0.4724	633	nucleus
ML05637	Chr04	9488597	9489270	-	0.3472	674	nucleus
ML05650	Chr04	9679973	9681052	+	0.3704	1080	chloroplast
ML05704	Chr04	10473795	10474229	+	0.3816	435	chloroplast
ML05841	Chr04	12118771	12122176	+	0.2551	3406	extracellular space
ML05850	Chr04	12222381	12223079	-	0.3491	699	extracellular space
ML05904	Chr04	12912585	12914307	+	0.3401	1723	nucleus
ML05943	Chr04	13678073	13680172	-	0.3719	2100	organelle membrane
ML05944	Chr04	13678448	13678868	-	0.3658	421	chloroplast
ML05946	Chr04	13682028	13682439	-	0.4248	412	nucleus
ML06071	Chr04	15245787	15251660	-	0.319	5874	nucleus
ML06111	Chr04	15643426	15644833	-	0.4176	1408	organelle membrane
ML06247	Chr04	16959779	16960552	-	0.4083	774	nucleus
ML06252	Chr04	16977683	16978323	+	0.4212	641	chloroplast
ML06266	Chr04	17075509	17076523	-	0.4483	1015	nucleus
ML06277	Chr04	17161651	17162676	-	0.3791	1026	nucleus
ML06299	Chr04	17623874	17624206	+	0.4535	333	chloroplast
ML06313	Chr04	17751222	17751653	+	0.4583	432	endomembrane system
ML06322	Chr04	17815960	17816238	-	0.4695	279	extracellular space
ML06407	Chr04	19023292	19025363	+	0.3653	2072	nucleus
ML06441	Chr04	19390274	19390672	-	0.4236	399	nucleus
ML06557	Chr04	25843852	25848222	+	0.2915	4371	chloroplast
ML06561	Chr04	25802234	25802873	-	0.4703	640	nucleus
ML06580	Chr04	25504670	25505312	-	0.3872	643	extracellular space
ML06595	Chr04	25339656	25339993	+	0.4497	338	extracellular space
ML06612	Chr04	25162567	25162873	-	0.4235	307	extracellular space
ML06750	Chr04	23657207	23658990	+	0.37	1784	chloroplast thylakoid lumen
ML06822	Chr12	26777705	26780513	+	0.3119	2809	extracellular space
ML06824	Chr12	26480091	26486652	-	0.397	6562	nucleus	Gene duplication:ML17813
ML06843	Chr12	25457309	25457653	-	0.5681	345	chloroplast
ML06868	Chr12	23613989	23614315	-	0.4709	327	chloroplast
ML06875	Chr12	22835817	22836566	+	0.416	750	extracellular space	Gene duplication:ML18575
ML06898	Chr12	20468210	20472994	+	0.3557	4785	chloroplast	Gene duplication:ML24752
ML06961	Chr12	15332579	15332875	-	0.3939	297	organelle membrane
ML06978	Chr12	12675650	12678779	+	0.4415	3130	nucleus	Gene duplication:ML15375
ML06979	Chr12	12225760	12231639	-	0.3117	5880	nucleus
ML07079	Chr12	6343299	6345324	-	0.4047	2026	extracellular space
ML07082	Chr12	6086644	6090490	-	0.3387	3847	endomembrane system
ML07116	Chr12	4844066	4844386	+	0.6231	321	nucleus
ML07118	Chr12	4804084	4806406	+	0.4176	2323	nucleus
ML07139	Chr14	897545	897895	+	0.6154	351	extracellular space
ML07145	Chr14	1120004	1120635	+	0.4794	632	nucleus
ML07204	Chr14	3372251	3372706	+	0.5307	456	nucleus
ML07239	Chr14	4364861	4366730	-	0.3695	1870	chloroplast
ML07250	Chr14	4732199	4732678	+	0.525	480	nucleus
ML07269	Chr14	5124599	5125115	+	0.4526	517	nucleus
ML07291	Chr14	5601812	5602141	+	0.5242	330	nucleus
ML07317	Chr14	6206934	6207908	+	0.4195	975	nucleus
ML07424	Chr14	8435298	8435621	+	0.4877	324	nucleus
ML07465	Chr16	2359901	2365045	+	0.387	5145	nucleus
ML07474	Chr16	2265870	2266259	+	0.459	390	extracellular space
ML07481	Chr16	2104221	2106897	-	0.3284	2677	extracellular space
ML07521	Chr16	1366363	1367275	+	0.4491	913	nucleus	Gene duplication:ML03373
ML07528	Chr16	1176716	1180618	-	0.3805	3903	chloroplast
ML07544	Chr16	835167	835406	-	0.5292	240	extracellular space
ML07598	Chr13	1708509	1708820	-	0.5577	312	chloroplast	Gene duplication:ML30856
ML07647	Chr13	2606552	2606833	+	0.4397	282	extracellular space
ML07656	Chr13	2782779	2783100	+	0.5155	322	mitochondrion	Gene duplication:ML07653
ML07695	Chr13	3451991	3452290	+	0.5067	300	nucleus
ML07699	Chr13	3647725	3648389	-	0.4556	665	nucleus
ML07710	Chr13	3874083	3874444	-	0.3729	362	chloroplast
ML07718	Chr13	3959922	3960892	-	0.3996	971	nucleus
ML07743	Chr13	4338953	4339438	-	0.4568	486	chloroplast
ML07761	Chr13	4613164	4614054	+	0.5758	891	nucleus	Gene duplication:ML27844
ML07832	Chr13	6181523	6182595	+	0.4231	1073	extracellular space
ML07849	Chr13	6614234	6614653	+	0.4167	420	chloroplast
ML07862	Chr13	6888017	6888496	-	0.5667	480	nucleus
ML07936	Chr15	10986252	10986812	+	0.5152	561	nucleus
ML07962	Chr15	10531528	10532028	-	0.4092	501	nucleus
ML07976	Chr15	10362248	10362556	+	0.4272	309	chloroplast
ML07990	Chr15	10042497	10043461	+	0.4207	965	chloroplast
ML08049	Chr15	9072802	9073614	-	0.3875	813	endomembrane system
ML08080	Chr15	8555400	8556279	-	0.6364	880	extracellular space
ML08103	Chr15	8310125	8310826	+	0.4288	702	extracellular space
ML08211	Chr15	6937521	6938199	+	0.3166	679	nucleus	Gene duplication:ML22506
ML08215	Chr15	6910411	6910686	-	0.5109	276	chloroplast
ML08296	Chr15	5754614	5755231	+	0.5	618	nucleus	Gene duplication:ML29721
ML08372	Chr15	4706938	4711720	-	0.3843	4783	chloroplast
ML08376	Chr15	4587818	4588639	+	0.4294	822	nucleus
ML08385	Chr15	4320082	4320318	+	0.4895	237	nucleus
ML08386	Chr15	4319750	4320043	+	0.5748	294	chloroplast
ML08403	Chr15	4035678	4035893	-	0.4444	216	nucleus
ML08422	Chr15	3746639	3749721	-	0.3558	3083	endomembrane system
ML08424	Chr15	3739986	3742981	+	0.3915	2996	endomembrane system
ML08436	Chr15	3632731	3633244	-	0.3872	514	nucleus
ML08470	Chr15	3254516	3254716	+	0.5771	201	nucleus	Gene duplication:ML20852
ML08477	Chr15	3131670	3134714	-	0.31	3045	chloroplast
ML08487	Chr15	3045865	3046259	+	0.4076	395	endomembrane system
ML08491	Chr15	3001397	3003697	-	0.3464	2301	endomembrane system	Gene duplication:ML26374
ML08587	Chr15	1769085	1770207	+	0.3722	1123	organelle membrane
ML08648	Chr02	85917050	85920852	+	0.2885	3803	nucleus
ML08674	Chr02	85690495	85691495	-	0.4665	1001	nucleus
ML08720	Chr02	85178387	85178899	+	0.5224	513	endomembrane system
ML08842	Chr02	83711400	83712084	+	0.3927	685	endomembrane system
ML08867	Chr02	83373131	83374211	-	0.4033	1081	chloroplast
ML08907	Chr02	82918451	82920678	-	0.3299	2228	chloroplast	Gene duplication:ML11009
ML08991	Chr02	82096005	82097048	+	0.3879	1044	nucleus
ML09022	Chr02	81803847	81805018	-	0.4121	1172	endomembrane system
ML09023	Chr02	81776983	81778423	-	0.406	1441	endomembrane system
ML09039	Chr02	81576048	81576416	+	0.6287	369	nucleus
ML09040	Chr02	81575432	81575889	-	0.4367	458	chloroplast
ML09066	Chr02	81247178	81249737	+	0.4156	2560	extracellular space
ML09067	Chr02	81247817	81248080	+	0.5985	264	extracellular space
ML09146	Chr10	45683568	45684870	-	0.3423	1303	nucleus
ML09156	Chr10	45412397	45413512	+	0.3539	1116	extracellular space
ML09251	Chr10	42070546	42073379	-	0.3783	2834	mitochondrion
ML09285	Chr10	40322482	40324918	-	0.3545	2437	nucleus
ML09296	Chr10	39846505	39848063	-	0.3849	1559	nucleus	Gene duplication:ML13916
ML09314	Chr10	38248509	38251230	+	0.3472	2722	nucleus
ML09327	Chr10	37299854	37312835	-	0.3388	12982	chloroplast
ML09444	Chr10	28444309	28444933	+	0.4064	625	plasma membrane
ML09524	Chr10	24722577	24724556	+	0.347	1980	nucleus
ML09561	Chr10	23731811	23732186	+	0.367	376	chloroplast
ML09592	Chr10	22344112	22348481	+	0.3739	4370	extracellular space
ML09635	Chr10	19902043	19910129	+	0.3847	8087	nucleus
ML09638	Chr10	19756399	19757205	-	0.3941	807	extracellular space	Gene duplication:ML09637
ML09662	Chr10	18211052	18211735	-	0.4415	684	nucleus
ML09670	Chr10	17932438	17932710	-	0.5641	273	nucleus
ML09684	Chr10	17475142	17477362	-	0.4151	2221	mitochondrion	Gene duplication:ML01385
ML09696	Chr10	17265838	17266098	+	0.6169	261	nucleus
ML09738	Chr10	16063757	16066909	+	0.365	3153	chloroplast	Gene duplication:ML02000
ML09755	Chr10	15733019	15733234	+	0.5417	216	nucleus
ML09756	Chr10	15730444	15732282	+	0.4372	1839	nucleus
ML09857	Chr10	12551600	12552249	-	0.3723	650	nucleus
ML09911	Chr10	11138738	11139427	-	0.4217	690	nucleus
ML09925	Chr10	10842894	10843540	-	0.4328	647	extracellular space
ML09929	Chr10	10734526	10735427	-	0.439	902	endomembrane system	Gene duplication:ML09924
ML09933	Chr10	10700820	10701137	+	0.6195	318	extracellular space
ML09976	Chr10	9647090	9647302	+	0.4883	213	chloroplast
ML10106	Chr10	7559590	7560122	-	0.4597	533	extracellular space
ML10190	Chr10	5711319	5716109	+	0.3726	4791	chloroplast
ML10319	Chr10	2546303	2549924	+	0.3498	3622	nucleus	Gene duplication:ML29814
ML10499	Chr06	32324003	32326805	+	0.3186	2803	chloroplast
ML10516	Chr15	12110965	12111631	-	0.3763	667	nucleus	Gene duplication:ML00404
ML10520	Chr15	12183570	12183989	+	0.4333	420	chloroplast
ML10539	Chr15	12530681	12530908	-	0.4561	228	organelle membrane
ML10627	Chr15	14993097	14997118	-	0.3294	4022	chloroplast
ML10639	Chr15	15408539	15409576	+	0.447	1038	plasma membrane	Gene duplication:ML29392
ML10695	Chr04	64537250	64541948	+	0.303	4699	nucleus	Gene duplication:ML22303
ML10783	Chr04	59105282	59107362	+	0.3614	2081	extracellular space	Gene duplication:ML24761
ML10795	Chr04	57527363	57527836	-	0.3143	474	endomembrane system
ML10802	Chr04	57126716	57127126	+	0.3552	411	nucleus	Gene duplication:ML15004
ML10820	Chr04	56058197	56059424	+	0.3713	1228	nucleus
ML10859	Chr04	52161048	52164389	-	0.3241	3342	extracellular space
ML10897	Chr04	50777271	50779401	+	0.3125	2131	chloroplast
ML10927	Chr04	49917369	49917952	-	0.4332	584	nucleus	Gene duplication:ML22230
ML10985	Chr04	47250811	47256162	+	0.3208	5352	nucleus	Gene duplication:ML08598
ML10987	Chr04	47220483	47221177	+	0.364	695	chloroplast
ML11037	Chr04	45630528	45631538	+	0.5737	1011	chloroplast
ML11038	Chr04	45630671	45631237	-	0.6473	567	nucleus
ML11041	Chr04	45569958	45573688	-	0.2584	3731	nucleus	Gene duplication:ML11036
ML11049	Chr04	45282045	45284474	+	0.4588	2430	nucleus	Gene duplication:ML05210
ML11051	Chr04	45197690	45198545	+	0.34	856	extracellular space
ML11100	Chr04	43855893	43857896	+	0.4311	2004	nucleus	Gene duplication:ML02273
ML11144	Chr04	42225695	42226066	+	0.4892	372	chloroplast
ML11158	Chr04	41884225	41885103	+	0.4699	879	nucleus	Gene duplication:ML11156
ML11164	Chr04	41780748	41781044	+	0.5724	297	nucleus
ML11215	Chr04	40772995	40773607	-	0.4372	613	extracellular space	Gene duplication:ML19509
ML11261	Chr04	39350882	39351836	-	0.4304	955	nucleus
ML11268	Chr04	39222999	39225634	-	0.3046	2636	chloroplast
ML11279	Chr04	38827677	38828440	-	0.3495	764	extracellular space
ML11309	Chr04	38138878	38140908	-	0.3476	2031	plasma membrane	Gene duplication:ML10705
ML11321	Chr04	37920727	37920975	-	0.498	249	nucleus
ML11335	Chr04	36960020	36960748	-	0.4733	729	extracellular space
ML11365	Chr04	36309221	36309472	+	0.5714	252	nucleus
ML11387	Chr04	36008229	36008456	-	0.614	228	nucleus
ML11418	Chr04	35404878	35405099	-	0.4505	222	chloroplast
ML11422	Chr04	35288978	35289946	-	0.387	969	chloroplast
ML11425	Chr04	35223974	35226139	-	0.3541	2166	chloroplast
ML11433	Chr04	35052589	35052921	+	0.5646	333	extracellular space
ML11471	Chr04	34374063	34376488	+	0.3256	2426	nucleus
ML11472	Chr04	34369990	34370400	-	0.635	411	nucleus
ML11591	Chr04	32057377	32057933	+	0.4075	557	nucleus
ML11669	Chr04	30899471	30901541	-	0.3684	2071	extracellular space
ML11704	Chr04	30506260	30506917	-	0.4195	658	extracellular space
ML11733	Chr04	30216974	30218554	-	0.327	1581	chloroplast
ML11747	Chr04	30053282	30054993	+	0.3668	1712	nucleus	Gene duplication:ML21171
ML11769	Chr15	967758	970270	+	0.3677	2513	chloroplast thylakoid lumen
ML11839	Chr06	21214143	21214535	+	0.6896	393	anchored component of plasma membrane
ML11861	Chr06	20951976	20953516	+	0.364	1541	nucleus
ML11962	Chr06	19561966	19563118	+	0.4675	1153	nucleus
ML11965	Chr06	19556419	19557209	-	0.3616	791	chloroplast
ML11996	Chr06	19232529	19234697	-	0.4781	2169	nucleus
ML12016	Chr06	19076792	19077154	-	0.6667	363	chloroplast
ML12042	Chr06	18663740	18664042	+	0.6073	303	nucleus
ML12072	Chr06	18250815	18251036	-	0.4279	222	nucleus
ML12085	Chr06	17990652	17991191	+	0.4148	540	nucleus
ML12102	Chr06	17647384	17647795	+	0.415	412	extracellular space
ML12117	Chr06	17486809	17489575	+	0.3654	2767	chloroplast
ML12118	Chr06	17460026	17460714	-	0.4049	689	chloroplast
ML12135	Chr06	17210161	17210559	+	0.5138	399	nucleus
ML12215	Chr06	16025274	16026531	+	0.4277	1258	nucleus
ML12270	Chr06	15103451	15104842	+	0.4016	1392	chloroplast
ML12378	Chr06	12825521	12827787	+	0.3608	2267	nucleus
ML12394	Chr06	12543912	12544112	+	0.5871	201	nucleus
ML12449	Chr08	26909511	26909795	-	0.5333	285	extracellular space
ML12453	Chr08	26870425	26870783	-	0.4708	359	chloroplast
ML12486	Chr08	26146390	26146990	-	0.6273	601	extracellular space
ML12519	Chr08	25724993	25735324	-	0.3615	10332	extracellular space	Gene duplication:ML32180
ML12549	Chr08	25460901	25462037	+	0.3712	1137	nucleus
ML12589	Chr08	24980106	24980444	+	0.6578	339	extracellular space
ML12678	Chr06	23064226	23066198	+	0.3401	1973	nucleus
ML12702	Chr06	23265166	23272461	+	0.3353	7296	nucleus	Gene duplication:ML21737
ML12717	Chr06	23426036	23426492	+	0.453	457	chloroplast
ML12746	Chr06	23731130	23731522	-	0.4046	393	extracellular space
ML12762	Chr06	23856557	23857653	+	0.3464	1097	nucleus	Gene duplication:ML32448
ML12774	Chr06	23951145	23953894	-	0.3411	2750	extracellular space
ML12889	Chr06	25653622	25655048	+	0.3567	1427	chloroplast
ML12910	Chr06	25930474	25932001	+	0.3855	1528	nucleus
ML12935	Chr06	26227709	26228017	+	0.4498	309	chloroplast	Gene duplication:ML19910
ML12965	Chr06	26791107	26792016	+	0.411	910	nucleus
ML12973	Chr06	26997140	26998220	-	0.383	1081	extracellular space
ML13059	Chr06	28191740	28192534	+	0.3711	795	nucleus
ML13067	Chr06	28321187	28321591	+	0.3852	405	nucleus
ML13091	Chr06	28591261	28592519	+	0.3725	1259	extracellular space	Gene duplication:ML13092
ML13138	Chr06	29218322	29218546	-	0.48	225	extracellular space
ML13228	Chr06	30698076	30701088	-	0.3591	3013	nucleus
ML13232	Chr06	30753083	30755769	-	0.3584	2687	nucleus	Gene duplication:ML09259
ML13280	Chr13	10961461	10964843	+	0.4295	3383	nucleus	Gene duplication:ML03490
ML13284	Chr13	10874087	10877687	-	0.368	3601	nucleus
ML13318	Chr13	9991801	9992133	+	0.4865	333	chloroplast
ML13336	Chr13	9417106	9417941	+	0.3923	836	chloroplast
ML13340	Chr13	9255518	9258431	+	0.3857	2914	nucleus	Gene duplication:ML12229
ML13364	Chr13	8844314	8845143	-	0.4518	830	nucleus
ML13373	Chr13	8569460	8569804	-	0.5449	345	nucleus
ML13374	Chr13	8538604	8539461	+	0.6212	858	chloroplast
ML13382	Chr13	8202543	8202974	+	0.5278	432	nucleus
ML13384	Chr13	8133577	8135984	-	0.4194	2408	extracellular space
ML13503	Chr06	66348684	66351954	+	0.3959	3271	nucleus	Gene duplication:ML12628
ML13506	Chr06	66384274	66385955	-	0.4328	1682	nucleus
ML13536	Chr12	29592098	29592499	+	0.403	402	nucleus
ML13592	Chr12	30813138	30813425	+	0.5694	288	chloroplast
ML13594	Chr12	30837275	30839240	-	0.3637	1966	nucleus
ML13597	Chr12	30906421	30906831	-	0.326	411	nucleus
ML13628	Chr12	31699150	31699645	-	0.4194	496	organelle membrane
ML13629	Chr12	31703760	31704478	+	0.4367	719	organelle membrane
ML13663	Chr12	32268827	32269409	+	0.3774	583	chloroplast
ML13682	Chr12	32646108	32646527	-	0.4952	420	chloroplast thylakoid lumen
ML13686	Chr12	32728686	32729999	-	0.3721	1314	endomembrane system
ML13714	Chr12	33270856	33274423	+	0.3189	3568	chloroplast
ML13751	Chr12	35197701	35198027	-	0.6116	327	nucleus
ML13815	Chr06	63822429	63822710	-	0.461	282	nucleus
ML13822	Chr06	63232388	63234199	+	0.3217	1812	nucleus	Gene duplication:ML25746
ML13823	Chr06	63229600	63232660	+	0.3564	3061	chloroplast
ML13838	Chr06	62316791	62318775	+	0.3642	1985	nucleus	Gene duplication:ML25910
ML13874	Chr06	59296669	59298166	+	0.4553	1498	nucleus	Gene duplication:ML04425
ML13894	Chr06	57031828	57032037	+	0.4619	210	chloroplast	Gene duplication:ML25321
ML13931	Chr06	53763683	53763967	-	0.4561	285	extracellular space
ML13946	Chr06	51832670	51832936	+	0.4494	267	extracellular space
ML13974	Chr06	50548467	50550952	-	0.2884	2486	chloroplast
ML13997	Chr06	50077044	50084653	+	0.3439	7610	nucleus
ML14023	Chr06	48309888	48311798	+	0.3312	1911	chloroplast	Gene duplication:ML02179
ML14024	Chr06	48309414	48309842	+	0.5664	429	nucleus	Gene duplication:ML02179
ML14052	Chr06	47512059	47512367	-	0.3754	309	endomembrane system
ML14069	Chr06	46241000	46243532	-	0.4276	2533	nucleus
ML14070	Chr06	46241093	46241296	-	0.4412	204	nucleus	Gene duplication:ML30826
ML14146	Chr06	43747473	43749350	-	0.4995	1878	extracellular space
ML14185	Chr06	42588985	42589744	+	0.5579	760	nucleus
ML14240	Chr06	41337741	41338349	+	0.3842	609	organelle membrane
ML14249	Chr06	41058888	41059374	-	0.3655	487	nucleus
ML14290	Chr06	40113483	40115696	-	0.3911	2214	mitochondrion	Gene duplication:ML20227
ML14291	Chr06	40114275	40115693	-	0.3805	1419	chloroplast	Gene duplication:ML05132
ML14328	Chr06	39257340	39260452	+	0.3938	3113	nucleus
ML14363	Chr06	38686305	38690260	+	0.3094	3956	organelle membrane
ML14383	Chr06	38287853	38288348	+	0.3669	496	nucleus
ML14414	Chr06	37850507	37851007	+	0.4391	501	nucleus
ML14452	Chr06	37389793	37390754	+	0.317	962	nucleus	Gene duplication:ML24706
ML14468	Chr06	37173736	37174103	+	0.4348	368	chloroplast
ML14480	Chr06	36930110	36931304	+	0.3565	1195	extracellular space
ML14516	Chr06	36420226	36421941	-	0.3491	1716	extracellular space	Gene duplication:ML15216
ML14550	Chr06	35751380	35752219	-	0.5571	840	nucleus	Gene duplication:ML14551
ML14607	Chr06	34671334	34672890	+	0.361	1557	organelle membrane
ML14615	Chr06	34567015	34569726	-	0.2895	2712	chloroplast
ML14628	Chr02	80589451	80590036	-	0.3874	586	extracellular space
ML14648	Chr09	49314423	49315737	-	0.349	1315	chloroplast	Gene duplication:ML03307
ML14697	Chr09	48152046	48152431	+	0.4275	386	nucleus
ML14719	Chr09	47858223	47864408	-	0.2965	6186	nucleus	Gene duplication:ML14721
ML14723	Chr09	47754981	47760178	+	0.2757	5198	extracellular space
ML14781	Chr09	45560038	45560247	-	0.4667	210	nucleus
ML14796	Chr09	45008073	45011833	+	0.2973	3761	nucleus
ML14807	Chr09	44805623	44805826	-	0.4853	204	nucleus	Gene duplication:ML05058
ML14841	Chr09	44130879	44131210	+	0.4548	332	nucleus
ML14844	Chr09	44036471	44036725	+	0.5137	255	extracellular space
ML14864	Chr09	43612487	43613206	-	0.3528	720	nucleus
ML14865	Chr09	43611831	43612446	-	0.4302	616	nucleus	Gene duplication:ML14861
ML14900	Chr09	42424359	42424661	-	0.6007	303	nucleus
ML14918	Chr09	42074814	42078117	-	0.3462	3304	chloroplast
ML14924	Chr09	42002323	42004091	-	0.3177	1769	chloroplast
ML14929	Chr09	51508945	51509358	+	0.5483	414	nucleus
ML14947	Chr09	41322909	41323574	+	0.4144	666	nucleus
ML14987	Chr09	37965209	37968572	+	0.3261	3364	chloroplast	Gene duplication:ML01766
ML14990	Chr09	37915812	37916681	+	0.3885	870	organelle membrane	Gene duplication:ML27367
ML14997	Chr09	37757977	37759743	+	0.3611	1767	extracellular space
ML15028	Chr09	36146318	36150801	+	0.3153	4484	chloroplast
ML15086	Chr09	31061443	31061691	+	0.4458	249	chloroplast
ML15090	Chr09	30759048	30759981	-	0.4272	934	nucleus
ML15149	Chr09	26365832	26368032	+	0.4248	2201	nucleus	Gene duplication:ML15141
ML15159	Chr09	25879010	25879643	+	0.4022	634	chloroplast
ML15163	Chr09	25757219	25759749	-	0.3236	2531	chloroplast	Gene duplication:ML15161
ML15173	Chr09	25373651	25373872	+	0.5405	222	nucleus
ML15323	Chr11	4156540	4157560	-	0.3849	1021	chloroplast
ML15336	Chr11	4278138	4278755	+	0.4385	618	organelle membrane
ML15387	Chr11	4791404	4792028	-	0.3632	625	endomembrane system
ML15397	Chr11	4911377	4911718	+	0.4825	342	nucleus
ML15432	Chr11	5293041	5294364	-	0.4169	1324	nucleus
ML15448	Chr11	5518368	5519415	-	0.3263	1048	extracellular space
ML15554	Chr11	6776069	6787757	+	0.3053	11689	chloroplast
ML15557	Chr11	6841231	6841629	+	0.4185	399	nucleus
ML15565	Chr11	6941298	6942082	-	0.3631	785	chloroplast
ML15616	Chr11	7603795	7610889	+	0.2753	7095	chloroplast	Gene duplication:ML32740
ML15888	Chr05	63920514	63920933	+	0.5429	420	nucleus
ML16032	Chr01	89067472	89068054	+	0.3705	583	organelle membrane
ML16075	Chr08	61933171	61934379	+	0.4657	1209	organelle membrane
ML16076	Chr08	61932386	61932893	-	0.4429	508	endomembrane system
ML16081	Chr08	61617622	61618018	-	0.3678	397	extracellular space
ML16197	Chr15	22108042	22108544	+	0.3579	503	chloroplast
ML16200	Chr15	21807794	21808378	-	0.5487	585	nucleus
ML16201	Chr15	21807438	21807743	-	0.5065	306	nucleus
ML16205	Chr15	21468183	21472818	-	0.3384	4636	nucleus	Gene duplication:ML32374
ML16211	Chr15	21076041	21076702	-	0.352	662	nucleus
ML16333	Chr02	79171745	79172035	-	0.5979	291	nucleus	Gene duplication:ML03161
ML16343	Chr02	79033148	79033775	-	0.4108	628	chloroplast
ML16352	Chr02	78974682	78975255	+	0.4111	574	nucleus
ML16393	Chr02	78625197	78625508	-	0.4359	312	extracellular space
ML16395	Chr02	78624700	78624924	+	0.5511	225	extracellular space
ML16462	Chr02	77963760	77964029	+	0.4519	270	extracellular space
ML16506	Chr02	77489617	77489999	+	0.423	383	endomembrane system
ML16554	Chr02	77010689	77011066	+	0.4947	378	nucleus
ML16647	Chr02	75926971	75930265	+	0.4067	3295	chloroplast
ML16648	Chr02	75926971	75927838	+	0.4355	868	nucleus
ML16741	Chr02	75055642	75060418	+	0.3892	4777	nucleus
ML16874	Chr14	31410615	31411362	+	0.369	748	chloroplast
ML16882	Chr14	31342797	31344346	-	0.3697	1550	extracellular space
ML16903	Chr14	30998161	30998592	-	0.4468	432	plasma membrane
ML16951	Chr14	30507007	30508295	+	0.377	1289	chloroplast
ML16969	Chr14	30294305	30296817	+	0.4286	2513	chloroplast
ML17037	Chr14	29478750	29479571	+	0.4465	822	nucleus
ML17327	Chr14	26171821	26172664	+	0.4028	844	extracellular space
ML17352	Chr14	25865429	25865734	-	0.4902	306	extracellular space
ML17367	Chr14	25728354	25728727	-	0.4626	374	nucleus
ML17380	Chr14	25606558	25606917	-	0.3528	360	organelle membrane
ML17437	Chr14	25022959	25023210	+	0.5595	252	nucleus
ML17451	Chr14	24868383	24870147	+	0.2867	1765	chloroplast
ML17537	Chr14	23602357	23603007	-	0.5914	651	nucleus	Gene duplication:ML15183
ML17554	Chr14	23432713	23433015	-	0.4884	303	nucleus
ML17588	Chr14	22938147	22939779	+	0.3295	1633	nucleus
ML17594	Chr14	22872898	22873155	+	0.5039	258	nucleus
ML17607	Chr14	22653028	22655258	+	0.4061	2231	plasma membrane
ML17633	Chr14	22400128	22401857	+	0.4821	1730	chloroplast
ML17734	Chr14	21190913	21191152	-	0.4708	240	extracellular space	Gene duplication:ML27175
ML17818	Chr14	20164030	20164323	-	0.5952	294	extracellular space
ML17826	Chr14	20071801	20072154	+	0.3616	354	organelle membrane
ML17828	Chr14	20068671	20068976	-	0.5229	306	nucleus
ML17837	Chr14	19932511	19933380	-	0.3552	870	extracellular space
ML17858	Chr14	19696788	19697444	+	0.4262	657	chloroplast
ML17899	Chr14	18961636	18962661	+	0.5419	1026	mitochondrion
ML17966	Chr14	18147672	18147923	-	0.5556	252	nucleus
ML17978	Chr14	17959142	17959806	-	0.3805	665	nucleus	Gene duplication:ML30221
ML18062	Chr14	16831728	16833223	+	0.3884	1496	extracellular space	Gene duplication:ML14599
ML18089	Chr14	16395815	16397500	-	0.3523	1686	chloroplast	Gene duplication:ML01746
ML18126	Chr14	15632232	15634894	-	0.3669	2663	extracellular space
ML18133	Chr14	15413339	15414434	-	0.3504	1096	mitochondrion	Gene duplication:ML03307
ML18138	Chr14	15311700	15312026	-	0.4557	327	plasma membrane
ML18183	Chr14	14656544	14657450	-	0.4576	907	extracellular space
ML18192	Chr14	14524154	14524715	+	0.4217	562	chloroplast
ML18259	Chr14	13642744	13643652	+	0.4752	909	nucleus
ML18260	Chr14	13629073	13630606	+	0.4166	1534	nucleus
ML18303	Chr14	12828371	12828972	-	0.3987	602	endomembrane system
ML18333	Chr14	12366258	12366521	+	0.5644	264	nucleus
ML18347	Chr14	11928013	11929985	-	0.3507	1973	chloroplast thylakoid lumen
ML18349	Chr14	11919113	11920868	-	0.3645	1756	organelle membrane	Gene duplication:ML21171
ML18420	Chr11	18035486	18038823	+	0.361	3338	nucleus
ML18423	Chr11	18075245	18078792	+	0.4112	3548	chloroplast
ML18424	Chr11	18118385	18119463	-	0.3855	1079	nucleus
ML18433	Chr11	18276013	18276552	+	0.4167	540	nucleus
ML18482	Chr15	26194115	26194378	+	0.6061	264	nucleus
ML18505	Chr11	19820083	19822736	+	0.3474	2654	nucleus
ML18517	Chr11	20116593	20119172	-	0.3058	2580	organelle membrane
ML18524	Chr11	20330387	20331111	-	0.3641	725	chloroplast
ML18530	Chr11	20527552	20530655	+	0.3312	3104	nucleus	Gene duplication:ML18537
ML18532	Chr11	20557906	20564778	+	0.3467	6873	nucleus	Gene duplication:ML18537
ML18533	Chr11	20561861	20562189	+	0.4012	329	chloroplast
ML18551	Chr11	21082220	21083384	+	0.3579	1165	nucleus
ML18586	Chr11	22634218	22634782	-	0.4088	565	chloroplast
ML18598	Chr11	23061834	23062927	-	0.3656	1094	chloroplast	Gene duplication:ML09222
ML18602	Chr11	23120055	23120396	+	0.6725	342	organelle membrane
ML18618	Chr11	23371630	23375571	+	0.3001	3942	chloroplast
ML18632	Chr11	24238359	24250074	+	0.274	11716	nucleus	Gene duplication:ML23934
ML18633	Chr11	24248956	24249300	-	0.5971	345	nucleus	Gene duplication:ML01963
ML18669	Chr11	25635437	25640526	+	0.3562	5090	extracellular space
ML18705	Chr03	1199317	1199544	+	0.5789	228	chloroplast
ML18722	Chr03	1408011	1408298	+	0.5729	288	chloroplast
ML18788	Chr03	2269752	2269985	+	0.5385	234	nucleus
ML18826	Chr03	2873443	2874023	+	0.4664	581	extracellular space
ML18972	Chr07	6559040	6560834	+	0.3621	1795	chloroplast
ML18988	Chr07	6818029	6820882	+	0.369	2854	endomembrane system	Gene duplication:ML18986
ML19011	Chr07	7318949	7319227	+	0.6165	279	nucleus
ML19108	Chr07	9115676	9115984	-	0.4531	309	anchored component of plasma membrane
ML19116	Chr07	9188250	9188570	-	0.5234	321	extracellular space
ML19127	Chr07	9321212	9325246	+	0.2248	4035	extracellular space
ML19130	Chr07	9415607	9416115	-	0.499	509	nucleus
ML19241	Chr07	11329473	11329916	+	0.4437	444	nucleus	Gene duplication:ML19235
ML19285	Chr07	12524666	12525220	+	0.4234	555	nucleus	Gene duplication:ML19815
ML19322	Chr07	13261695	13262174	+	0.45	480	chloroplast
ML19352	Chr07	14164341	14164905	+	0.508	565	extracellular space
ML19357	Chr07	14395027	14396009	+	0.4842	983	extracellular space
ML19359	Chr07	14421837	14422151	-	0.4825	315	extracellular space
ML19367	Chr07	14523310	14533122	+	0.3428	9813	nucleus
ML19370	Chr07	14567633	14568001	-	0.458	369	chloroplast
ML19380	Chr07	14889316	14889901	+	0.3652	586	nucleus	Gene duplication:ML19385
ML19381	Chr07	14891370	14894429	-	0.3497	3060	chloroplast
ML19384	Chr07	14974753	14976676	+	0.3394	1924	chloroplast
ML19441	Chr07	16557106	16561321	+	0.2813	4216	nucleus
ML19475	Chr07	17535440	17535805	-	0.3689	366	chloroplast
ML19488	Chr07	17888645	17890887	-	0.3741	2243	chloroplast
ML19516	Chr07	18955960	18958259	-	0.3948	2300	nucleus
ML19578	Chr07	21794235	21794567	+	0.6637	333	nucleus
ML19663	Chr07	27181271	27186163	-	0.3789	4893	chloroplast	Gene duplication:ML10631
ML19686	Chr07	28027753	28028561	+	0.3288	809	chloroplast
ML19752	Chr07	32993747	32994998	-	0.3562	1252	chloroplast
ML19759	Chr07	33201447	33202752	-	0.3652	1306	chloroplast
ML19808	Chr07	37023744	37024540	-	0.3538	797	chloroplast
ML19834	Chr07	39530022	39531372	+	0.3457	1351	extracellular space
ML19842	Chr07	39767352	39777891	-	0.2747	10540	extracellular space	Gene duplication:ML19845
ML19847	Chr07	40117580	40122544	-	0.3807	4965	nucleus	Gene duplication:ML09994
ML19848	Chr07	40120950	40122651	-	0.4019	1702	chloroplast thylakoid lumen
ML19876	Chr07	41845237	41847032	-	0.3202	1796	nucleus	Gene duplication:ML31542
ML19886	Chr07	42296071	42296295	-	0.5378	225	nucleus	Gene duplication:ML02000
ML19889	Chr07	42442113	42445732	+	0.3354	3620	chloroplast
ML19929	Chr07	43949704	43950527	+	0.3944	824	chloroplast	Gene duplication:ML21643
ML19967	Chr07	45427599	45427814	+	0.5324	216	chloroplast
ML20052	Chr07	47944745	47945026	+	0.4645	282	extracellular space
ML20083	Chr07	48811958	48812386	-	0.3706	429	nucleus
ML20156	Chr07	49944856	49945869	+	0.4487	1014	nucleus
ML20221	Chr07	51801206	51820767	-	0.3104	19562	extracellular space	Gene duplication:ML29715
ML20328	Chr04	28490443	28491020	+	0.4498	578	extracellular space
ML20339	Chr04	28314099	28316266	-	0.5152	2168	nucleus	Gene duplication:ML10389
ML20374	Chr04	27905929	27908156	+	0.3609	2228	chloroplast
ML20376	Chr04	27887105	27887567	-	0.4147	463	chloroplast
ML20388	Chr04	27776310	27777179	+	0.3621	870	extracellular space
ML20643	Chr16	8048718	8049597	+	0.45	880	nucleus	Gene duplication:ML15954
ML20730	Chr16	8928636	8929273	-	0.3903	638	organelle membrane
ML20742	Chr16	9120281	9121344	+	0.3186	1064	nucleus
ML20758	Chr16	9432550	9437508	-	0.3759	4959	nucleus
ML20863	Chr16	10684927	10691752	+	0.3473	6826	chloroplast
ML20900	Chr16	11104298	11105040	+	0.3917	743	organelle membrane
ML20901	Chr16	11128980	11130576	-	0.3826	1597	extracellular space
ML20902	Chr16	11137135	11137859	-	0.4014	725	extracellular space
ML20903	Chr16	11143202	11143796	-	0.4471	595	extracellular space
ML20904	Chr16	11149218	11149574	-	0.4314	357	nucleus
ML20905	Chr16	11156610	11157756	-	0.3618	1147	extracellular space
ML20991	Chr16	12224066	12224746	-	0.3891	681	extracellular space
ML21024	Chr16	12657788	12658456	-	0.3827	669	organelle membrane
ML21186	Chr16	14800193	14800624	-	0.6644	432	chloroplast
ML21200	Chr16	14912850	14913071	+	0.527	222	nucleus
ML21221	Chr16	15203101	15203532	-	0.4745	432	nucleus
ML21243	Chr16	15476930	15479886	-	0.2905	2957	extracellular space
ML21265	Chr16	15807829	15808146	-	0.4403	318	nucleus
ML21319	Chr16	16451736	16451966	+	0.5022	231	nucleus
ML21326	Chr16	16491772	16492503	+	0.3579	732	extracellular space	Gene duplication:ML14476
ML21495	Chr16	18435650	18436078	-	0.4009	429	chloroplast	Gene duplication:ML21493
ML21504	Chr16	18552725	18555788	+	0.3978	3064	nucleus
ML21528	Chr16	18830685	18830939	+	0.549	255	nucleus
ML21634	Chr16	19979377	19979766	-	0.6308	390	nucleus
ML21717	Chr16	22587032	22590792	+	0.2646	3761	mitochondrion
ML21794	Chr07	5507848	5509903	-	0.3628	2056	nucleus
ML21807	Chr07	5341193	5341429	-	0.5232	237	extracellular space
ML21814	Chr07	5286058	5287312	+	0.3865	1255	extracellular space
ML22003	Chr02	38706855	38707211	+	0.605	357	nucleus
ML22069	Chr02	37605601	37606180	-	0.4138	580	plasma membrane
ML22073	Chr02	37563776	37565006	-	0.5727	1231	extracellular space
ML22104	Chr02	37244562	37245167	-	0.4488	606	nucleus
ML22127	Chr02	36935087	36935377	-	0.4845	291	nucleus
ML22134	Chr02	36849758	36850451	+	0.4395	694	chloroplast
ML22135	Chr02	36847131	36848979	+	0.384	1849	plasma membrane
ML22143	Chr02	36688205	36696579	+	0.3299	8375	chloroplast
ML22174	Chr02	36086389	36087630	-	0.3792	1242	nucleus
ML22306	Chr02	33650313	33666258	-	0.3546	15946	nucleus
ML22307	Chr02	33664632	33665030	-	0.4286	399	nucleus
ML22323	Chr02	33361563	33361892	-	0.5061	330	nucleus
ML22324	Chr02	33356747	33359600	+	0.2821	2854	chloroplast
ML22334	Chr02	33170446	33174420	+	0.3925	3975	chloroplast	Gene duplication:ML13868
ML22335	Chr02	33152892	33159401	+	0.3232	6510	chloroplast	Gene duplication:ML28265
ML22367	Chr02	32748552	32750178	+	0.2747	1627	chloroplast
ML22411	Chr02	31805807	31806103	-	0.5421	297	extracellular space
ML22413	Chr02	31775983	31776635	-	0.4303	653	extracellular space
ML22427	Chr02	31469453	31470289	+	0.3978	837	chloroplast
ML22468	Chr02	30955270	30959191	+	0.3814	3922	organelle membrane
ML22491	Chr02	30309727	30310475	+	0.3204	749	extracellular space
ML22577	Chr02	28606303	28607317	-	0.4631	1015	chloroplast
ML22584	Chr02	28553717	28554267	-	0.3757	551	plasma membrane
ML22636	Chr02	27746042	27746254	-	0.615	213	nucleus
ML22640	Chr02	27644339	27644641	+	0.5842	303	nucleus
ML22681	Chr02	27073958	27074870	+	0.3943	913	chloroplast
ML22696	Chr02	26861321	26862101	+	0.388	781	chloroplast
ML22736	Chr02	26282284	26283951	-	0.3309	1668	chloroplast
ML22771	Chr02	25826878	25827171	+	0.4558	294	nucleus
ML22862	Chr02	24285543	24290770	+	0.2743	5228	extracellular space
ML22863	Chr02	24281095	24284152	+	0.3502	3058	chloroplast	Gene duplication:ML12819
ML22872	Chr02	24209102	24209851	+	0.4267	750	chloroplast
ML22916	Chr02	23348870	23349685	-	0.489	816	extracellular space
ML22995	Chr02	21149290	21149691	+	0.597	402	extracellular space
ML22996	Chr02	21099962	21100207	-	0.3211	246	nucleus	Gene duplication:ML05823
ML22999	Chr02	20945423	20946003	+	0.3769	581	chloroplast
ML23051	Chr02	19228715	19229406	+	0.4595	692	nucleus
ML23081	Chr02	18675202	18675753	+	0.4529	552	chloroplast
ML23091	Chr02	18474335	18477589	-	0.3628	3255	nucleus
ML23104	Chr02	18193670	18196979	+	0.3529	3310	nucleus
ML23163	Chr02	16693661	16693992	-	0.3404	332	chloroplast
ML23165	Chr02	16632391	16632804	-	0.3961	414	extracellular space
ML23179	Chr02	16149474	16150351	+	0.4431	878	chloroplast
ML23197	Chr02	15421233	15421490	+	0.6473	258	extracellular space
ML23210	Chr02	14821874	14826103	-	0.2773	4230	chloroplast thylakoid lumen
ML23211	Chr02	14821572	14821814	+	0.5021	243	mitochondrion	Gene duplication:ML20239
ML23239	Chr02	13668090	13668884	-	0.3962	795	nucleus
ML23295	Chr02	11207186	11209632	+	0.349	2447	nucleus	Gene duplication:ML00316
ML23296	Chr02	11199505	11199828	+	0.5772	324	chloroplast
ML23309	Chr02	10765688	10765906	+	0.5662	219	extracellular space	Gene duplication:ML18650
ML23310	Chr02	10743785	10744487	+	0.3983	703	chloroplast	Gene duplication:ML20697
ML23333	Chr02	9143707	9144033	-	0.4618	327	nucleus	Gene duplication:ML20182
ML23334	Chr02	9131178	9135819	-	0.3733	4642	chloroplast thylakoid lumen	Gene duplication:ML01262
ML23362	Chr02	5477655	5478110	-	0.3553	456	chloroplast
ML23367	Chr02	5291847	5292880	-	0.3714	1034	chloroplast
ML23374	Chr02	5189870	5192888	+	0.3455	3019	organelle membrane
ML23400	Chr02	3769335	3772591	-	0.3859	3257	chloroplast
ML23414	Chr01	85881264	85881488	+	0.4178	225	extracellular space	Gene duplication:ML13897
ML23425	Chr01	84054098	84058797	+	0.3936	4700	mitochondrion
ML23426	Chr01	83694332	83696245	-	0.3866	1914	organelle membrane
ML23427	Chr01	83693214	83694414	-	0.3789	1201	organelle membrane
ML23428	Chr01	83690866	83692953	+	0.3736	2088	organelle membrane
ML23429	Chr01	83689990	83691700	+	0.3933	1711	chloroplast
ML23433	Chr01	83425167	83436052	-	0.3567	10886	chloroplast	Gene duplication:ML25682
ML23476	Chr07	63174159	63177121	+	0.3476	2963	extracellular space
ML23492	Chr07	62621399	62622526	+	0.3378	1128	chloroplast
ML23497	Chr07	62439555	62442058	-	0.4533	2504	nucleus	Gene duplication:ML05210
ML23505	Chr07	61953937	61954509	-	0.3229	573	nucleus	Gene duplication:ML05823
ML23506	Chr07	61888798	61890917	+	0.3792	2120	plasma membrane
ML23507	Chr07	61841157	61846947	-	0.3925	5791	nucleus	Gene duplication:ML13916
ML23523	Chr07	60829219	60829931	+	0.3366	713	extracellular space
ML23571	Chr07	58963981	58965677	+	0.3842	1697	nucleus	Gene duplication:ML23725
ML23575	Chr07	58747339	58756638	-	0.382	9300	nucleus
ML23576	Chr07	58754313	58754642	+	0.4697	330	nucleus	Gene duplication:ML29343
ML23623	Chr07	56888525	56889106	-	0.5378	582	nucleus
ML23702	Chr07	53738814	53739131	-	0.5126	318	chloroplast
ML23737	Chr07	53372778	53374167	-	0.3633	1390	endomembrane system
ML23816	Chr02	50578002	50578734	+	0.4488	733	plasma membrane
ML23831	Chr02	50277115	50278611	+	0.4061	1497	organelle membrane
ML23876	Chr02	49702964	49703894	+	0.4146	931	nucleus
ML23890	Chr02	49596546	49597891	-	0.3707	1346	extracellular space
ML23939	Chr02	49102167	49102510	+	0.5203	344	nucleus	Gene duplication:ML19904
ML23946	Chr02	49007825	49008125	-	0.4053	301	extracellular space
ML24058	Chr02	47585575	47586081	+	0.426	507	chloroplast
ML24061	Chr02	47553936	47554442	+	0.426	507	chloroplast
ML24076	Chr02	47384868	47387284	+	0.343	2417	nucleus
ML24100	Chr02	47076516	47078644	+	0.3401	2129	nucleus	Gene duplication:ML06062
ML24346	Chr02	43565136	43565507	+	0.4435	372	nucleus
ML24347	Chr02	43549852	43550209	-	0.419	358	plasma membrane
ML24390	Chr02	42759209	42763821	+	0.274	4613	endomembrane system
ML24392	Chr02	42721967	42722382	+	0.4014	416	chloroplast
ML24442	Chr02	41960964	41962763	+	0.3517	1800	chloroplast	Gene duplication:ML21171
ML24460	Chr02	41681068	41681452	-	0.3558	385	extracellular space
ML24476	Chr06	31530346	31532957	-	0.2906	2612	nucleus
ML24591	Chr11	32130414	32131235	+	0.3905	822	nucleus	Gene duplication:ML09409
ML24613	Chr11	33832982	33835343	+	0.2981	2362	chloroplast
ML24620	Chr11	34322189	34327875	-	0.3466	5687	endomembrane system
ML24625	Chr11	34417510	34423060	+	0.4435	5551	nucleus
ML24626	Chr11	34422092	34422760	+	0.4126	669	nucleus	Gene duplication:ML10631
ML24642	Chr11	35455878	35456592	+	0.3189	715	organelle membrane	Gene duplication:ML17813
ML24695	Chr11	37847015	37847329	+	0.5143	315	extracellular space
ML24742	Chr11	39239690	39242038	-	0.3414	2349	nucleus
ML24748	Chr11	39387772	39388456	+	0.3854	685	endomembrane system
ML24776	Chr11	40974552	40976347	+	0.3101	1796	chloroplast
ML24831	Chr13	13311643	13312470	-	0.6437	828	extracellular space
ML24860	Chr13	14336332	14336760	-	0.6037	429	chloroplast
ML24874	Chr13	14942543	14945687	-	0.4397	3145	nucleus	Gene duplication:ML12628
ML24894	Chr13	15396127	15400358	+	0.3233	4232	nucleus	Gene duplication:ML11009
ML24904	Chr13	15746380	15747430	+	0.3568	1051	chloroplast	Gene duplication:ML12229
ML24994	Chr13	24501606	24501824	+	0.4429	219	extracellular space	Gene duplication:ML25321
ML25004	Chr11	13253009	13254217	+	0.3623	1209	chloroplast
ML25020	Chr11	12938149	12942624	-	0.3295	4476	nucleus
ML25068	Chr11	12396092	12396544	-	0.5254	453	organelle membrane
ML25111	Chr11	11776558	11777182	+	0.4576	625	chloroplast
ML25121	Chr11	11663946	11664288	+	0.5277	343	extracellular space
ML25155	Chr11	11108891	11110185	+	0.4185	1295	nucleus
ML25164	Chr11	10969390	10970340	-	0.4185	951	chloroplast
ML25183	Chr11	10692488	10693174	+	0.3959	687	extracellular space
ML25238	Chr11	9690558	9691925	-	0.3611	1368	nucleus
ML25241	Chr11	9681163	9681372	+	0.4905	210	extracellular space
ML25257	Chr11	9449922	9450387	+	0.4979	466	extracellular space
ML25258	Chr11	9450803	9453883	+	0.32	3081	anchored component of plasma membrane
ML25261	Chr11	9488807	9489387	-	0.432	581	nucleus
ML25262	Chr11	9499495	9501410	+	0.3659	1916	endomembrane system
ML25272	Chr11	9198116	9198499	-	0.5495	384	extracellular space
ML25273	Chr11	9155838	9157183	-	0.4123	1346	nucleus
ML25358	Chr16	3112298	3113009	+	0.4677	712	mitochondrion
ML25370	Chr16	3256882	3260673	-	0.3402	3792	extracellular space
ML25468	Chr16	4665733	4666406	-	0.4837	674	endomembrane system
ML25533	Chr06	11072893	11075543	-	0.3712	2651	nucleus
ML25540	Chr06	11001856	11005243	+	0.3557	3388	extracellular space
ML25560	Chr06	10561323	10587549	+	0.3402	26227	nucleus	Gene duplication:ML19621
ML25561	Chr06	10587037	10587246	+	0.4524	210	nucleus	Gene duplication:ML08210
ML25562	Chr06	10559816	10572715	+	0.3505	12900	nucleus
ML25570	Chr06	10519097	10524205	+	0.3592	5109	chloroplast
ML25576	Chr06	10246253	10246850	+	0.4749	598	chloroplast
ML25619	Chr06	8724841	8725392	+	0.6703	552	chloroplast thylakoid lumen
ML25696	Chr06	6145784	6147075	+	0.4187	1292	nucleus	Gene duplication:ML15878
ML25729	Chr06	5008209	5009171	+	0.4216	963	organelle membrane
ML25779	Chr06	3657536	3659411	+	0.3763	1876	nucleus
ML25796	Chr06	3288175	3290417	+	0.4766	2243	nucleus
ML25797	Chr06	3288152	3288463	-	0.5801	312	extracellular space
ML25850	Chr06	1075816	1081010	+	0.3444	5195	extracellular space
ML25858	Chr01	80662608	80666632	-	0.3558	4025	nucleus
ML25859	Chr01	80652322	80656486	-	0.3359	4165	chloroplast	Gene duplication:ML13783
ML25916	Chr01	75550240	75550624	-	0.4519	385	extracellular space
ML25918	Chr01	75174285	75174681	+	0.4559	397	extracellular space
ML25990	Chr01	67222447	67223866	+	0.3521	1420	nucleus
ML26082	Chr01	64266197	64267928	+	0.3464	1732	extracellular space	Gene duplication:ML02922
ML26109	Chr01	63677840	63678205	-	0.4563	366	nucleus
ML26121	Chr04	70830497	70831176	-	0.5647	680	chloroplast
ML26131	Chr04	70198347	70198751	+	0.6642	405	chloroplast
ML26201	Chr04	69132615	69133296	-	0.371	682	endomembrane system
ML26236	Chr04	68548564	68551236	-	0.2997	2673	nucleus
ML26251	Chr04	68373277	68374512	-	0.3649	1236	chloroplast
ML26279	Chr04	68040692	68042314	+	0.3783	1623	chloroplast
ML26348	Chr09	22211364	22214253	+	0.3536	2890	endomembrane system
ML26355	Chr09	22056848	22057430	-	0.458	583	extracellular space
ML26375	Chr09	21684594	21685287	-	0.353	694	extracellular space	Gene duplication:ML32822
ML26409	Chr09	20903269	20903670	-	0.4129	402	endomembrane system
ML26430	Chr09	20538596	20538886	-	0.7113	291	extracellular space
ML26431	Chr09	20538220	20538537	-	0.6635	318	mitochondrion
ML26514	Chr09	18288434	18288774	+	0.4604	341	extracellular space
ML26538	Chr09	17864410	17864652	-	0.4444	243	extracellular space
ML26544	Chr09	17755757	17756534	+	0.4794	778	chloroplast
ML26562	Chr09	17331901	17332650	+	0.596	750	nucleus
ML26624	Chr09	15985285	15987000	-	0.2931	1716	plasma membrane
ML26639	Chr09	15656867	15657337	-	0.4671	471	nucleus
ML26645	Chr09	15544063	15549539	+	0.2722	5477	chloroplast
ML26684	Chr09	14767379	14768182	+	0.454	804	organelle membrane
ML26707	Chr09	14427319	14428626	+	0.3326	1308	extracellular space
ML26744	Chr09	13779905	13783316	+	0.3347	3412	chloroplast	Gene duplication:ML26743
ML26794	Chr09	12999731	12999997	-	0.4944	267	extracellular space
ML26824	Chr09	12587601	12588500	-	0.5811	900	nucleus
ML26887	Chr09	11658575	11660706	-	0.3804	2132	organelle membrane
ML26888	Chr09	11606861	11608170	-	0.3962	1310	nucleus
ML26982	Chr09	10265070	10265294	-	0.4622	225	extracellular space
ML27018	Chr09	9757154	9757751	-	0.3612	598	chloroplast
ML27072	Chr09	8821290	8821667	+	0.3704	378	extracellular space
ML27087	Chr09	8567552	8570880	+	0.3827	3329	organelle membrane
ML27129	Chr09	7915491	7916805	-	0.3977	1315	nucleus
ML27159	Chr09	7507615	7507878	-	0.5114	264	organelle membrane
ML27162	Chr09	7452220	7453003	+	0.4974	784	nucleus
ML27173	Chr09	7307176	7307463	+	0.4236	288	nucleus
ML27196	Chr09	6982751	6984371	-	0.3319	1621	chloroplast
ML27283	Chr09	5816768	5817301	-	0.3764	534	organelle membrane
ML27290	Chr09	5763473	5763778	-	0.6307	306	extracellular space
ML27376	Chr09	4599606	4600698	-	0.4199	1093	nucleus	Gene duplication:ML30235
ML27409	Chr09	4208625	4208927	-	0.495	303	nucleus
ML27472	Chr09	3472907	3473714	+	0.422	808	nucleus
ML27483	Chr09	3321879	3322124	-	0.5203	246	chloroplast
ML27491	Chr09	3209450	3210803	+	0.3279	1354	chloroplast
ML27647	tig000000054	4435798	4439653	+	0.5921	3856	nucleus
ML27656	tig000000054	5563305	5564168	+	0.6053	864	nucleus
ML27669	Chr10	391782	392358	+	0.4627	577	nucleus	Gene duplication:ML19509
ML27703	Chr02	51017206	51019352	+	0.3223	2147	chloroplast	Gene duplication:ML18648
ML27704	Chr02	51033291	51034762	+	0.3974	1472	nucleus
ML27727	Chr02	51338249	51338608	-	0.4806	360	chloroplast	Gene duplication:ML07545
ML27792	Chr02	52191337	52192011	+	0.3911	675	chloroplast
ML27812	Chr02	52458634	52459774	-	0.5723	1141	chloroplast
ML27964	Chr02	54029594	54030238	-	0.4109	645	extracellular space
ML27965	Chr02	54031870	54032225	-	0.4494	356	extracellular space
ML27967	Chr02	54037842	54038279	-	0.4429	438	organelle membrane
ML28004	Chr02	54435607	54436287	-	0.4537	681	nucleus
ML28033	Chr02	54842307	54844977	+	0.3452	2671	chloroplast
ML28142	Chr02	56201626	56202337	-	0.389	712	endomembrane system
ML28209	Chr02	56979071	56980942	-	0.3835	1872	nucleus
ML28216	Chr02	57081371	57084062	+	0.3967	2692	extracellular space
ML28249	Chr02	57488222	57503438	-	0.3636	15217	chloroplast
ML28268	Chr02	57725234	57725704	+	0.3758	471	chloroplast
ML28415	Chr02	59466828	59467254	-	0.4473	427	extracellular space
ML28416	Chr02	59470877	59471325	-	0.4343	449	extracellular space
ML28417	Chr02	59489449	59489897	-	0.4343	449	extracellular space
ML28418	tig00000006	10418	10866	-	0.4343	449	extracellular space
ML28419	Chr02	61166937	61167385	+	0.4343	449	extracellular space
ML28420	Chr06	119180	119628	+	0.4343	449	extracellular space
ML28422	Chr02	59616966	59617488	-	0.3824	523	extracellular space
ML28423	Chr02	59631590	59632206	-	0.3874	617	extracellular space
ML28440	Chr02	59958832	59959279	-	0.4263	448	extracellular space
ML28441	Chr02	59960233	59960793	+	0.4207	561	extracellular space
ML28449	Chr02	60054693	60055251	-	0.4615	559	nucleus
ML28470	Chr02	60300424	60300783	-	0.4722	360	extracellular space
ML28599	Chr11	16233153	16234578	-	0.3527	1426	chloroplast
ML28617	Chr11	15864030	15866060	+	0.3333	2031	chloroplast
ML28621	Chr11	15824002	15825365	+	0.3248	1364	chloroplast
ML28675	Chr11	14833287	14834712	-	0.4635	1426	nucleus	Gene duplication:ML03760
ML28804	Chr16	22057319	22057615	-	0.6061	297	nucleus
ML28903	Chr14	10448623	10449297	+	0.5259	675	nucleus
ML29054	Chr01	56231253	56231691	+	0.4009	439	chloroplast
ML29270	Chr05	60378494	60378877	-	0.4948	384	nucleus
ML29310	Chr05	54223866	54225045	-	0.3814	1180	nucleus
ML29358	Chr05	50581422	50584911	+	0.3553	3490	nucleus	Gene duplication:ML05388
ML29363	Chr05	49831571	49831962	-	0.5128	392	extracellular space
ML29364	Chr05	49827063	49827454	-	0.5128	392	extracellular space
ML29384	Chr05	47339486	47339809	-	0.4537	324	extracellular space
ML29394	Chr05	46959164	46959487	-	0.6605	324	nucleus
ML29405	Chr05	46592060	46592323	+	0.5682	264	chloroplast
ML29422	Chr12	2294773	2297288	-	0.3092	2516	nucleus
ML29459	Chr05	43752354	43752888	+	0.3551	535	chloroplast
ML29525	Chr05	39624717	39624983	+	0.5581	267	nucleus
ML29539	Chr05	38842043	38842288	-	0.5569	246	extracellular space
ML29558	Chr05	38321164	38321731	+	0.4419	568	chloroplast thylakoid lumen
ML29570	Chr05	38047385	38052333	-	0.3558	4949	chloroplast
ML29577	Chr05	37666088	37669805	+	0.3895	3718	nucleus	Gene duplication:ML15878
ML29592	Chr05	37106002	37106460	-	0.5316	459	nucleus	Gene duplication:ML19358
ML29657	Chr05	35310733	35310954	-	0.509	222	chloroplast
ML29685	Chr05	34313821	34314141	+	0.5389	321	chloroplast thylakoid lumen
ML29704	Chr05	33935330	33935632	-	0.4455	303	chloroplast
ML29789	Chr05	31194133	31194578	+	0.417	446	nucleus
ML29791	Chr05	31101610	31104397	-	0.3759	2788	nucleus	Gene duplication:ML05009
ML29810	Chr05	30684274	30686651	-	0.4668	2378	nucleus
ML29862	Chr05	29687777	29688243	+	0.3662	467	chloroplast
ML29879	Chr05	29003187	29003414	-	0.5351	228	nucleus
ML29908	Chr05	28371320	28375179	-	0.3466	3860	nucleus
ML29924	Chr05	28107740	28112693	-	0.3732	4954	nucleus	Gene duplication:ML29926
ML29934	Chr05	27917239	27918516	-	0.3185	1278	nucleus
ML29937	Chr05	27890257	27890994	+	0.378	738	extracellular space
ML29938	Chr05	27834381	27834853	+	0.4567	473	extracellular space
ML29940	Chr05	27800009	27800377	+	0.5122	369	extracellular space
ML29942	Chr05	27685748	27686451	-	0.483	704	nucleus
ML29944	Chr05	27638881	27639174	+	0.4796	294	endomembrane system
ML29947	Chr05	27510336	27510629	+	0.4558	294	endomembrane system
ML29954	Chr05	27409290	27409986	+	0.4519	697	extracellular space	Gene duplication:ML29952
ML29959	Chr05	27236020	27237080	+	0.394	1061	extracellular space	Gene duplication:ML29952
ML29971	Chr05	26851839	26852303	+	0.4086	465	extracellular space
ML29972	Chr05	26767129	26767805	+	0.4431	677	chloroplast
ML29976	Chr05	26487445	26488788	+	0.3519	1344	extracellular space
ML29987	Chr05	26189084	26189599	+	0.407	516	plasma membrane
ML30144	Chr05	21705555	21710231	+	0.3015	4677	nucleus
ML30246	Chr05	18902579	18902887	+	0.4466	309	extracellular space
ML30290	Chr05	18144347	18147596	-	0.3471	3250	chloroplast
ML30322	Chr05	16535198	16539767	+	0.2823	4570	chloroplast
ML30389	Chr05	15198624	15200793	+	0.3705	2170	chloroplast thylakoid lumen	Gene duplication:ML03225
ML30405	Chr05	14984520	14986348	+	0.3909	1829	nucleus
ML30477	Chr05	13687409	13687957	+	0.3916	549	extracellular space
ML30600	Chr05	11686901	11687257	-	0.5406	357	nucleus
ML30603	Chr05	11588218	11588928	-	0.4416	711	chloroplast
ML30650	Chr05	10831761	10832358	+	0.4933	598	extracellular space
ML30687	Chr05	10084590	10087174	+	0.347	2585	chloroplast
ML30688	Chr05	10084108	10084632	+	0.4286	525	nucleus
ML30776	Chr05	8374051	8375356	+	0.4617	1306	plasma membrane
ML30829	Chr05	7692762	7695079	+	0.3753	2318	nucleus
ML30850	Chr05	7148376	7149496	+	0.4558	1121	mitochondrion
ML30874	Chr05	6848442	6848760	+	0.395	319	extracellular space
ML30875	Chr05	6831867	6834657	-	0.3511	2791	nucleus
ML31029	Chr05	4211198	4211899	+	0.4359	702	extracellular space
ML31032	Chr05	4096814	4097807	+	0.4195	994	nucleus
ML31073	Chr05	3673654	3674375	-	0.5194	722	nucleus
ML31098	Chr05	3232776	3233138	-	0.5041	363	chloroplast
ML31128	Chr05	2808375	2809505	-	0.3687	1131	chloroplast thylakoid lumen
ML31161	Chr02	73407343	73407655	+	0.4313	313	nucleus
ML31188	Chr02	73094523	73096980	+	0.3731	2458	extracellular space	Gene duplication:ML22983
ML31235	Chr02	72504574	72505561	-	0.3856	988	extracellular space
ML31263	Chr02	72184690	72186978	-	0.3408	2289	nucleus
ML31281	Chr02	71983628	71984907	+	0.4516	1280	extracellular space
ML31419	Chr02	70273718	70274697	+	0.3643	980	chloroplast
ML31465	Chr02	69834934	69839161	+	0.377	4228	nucleus
ML31646	Chr02	67511123	67511440	-	0.3742	318	chloroplast
ML31710	Chr02	66838893	66839249	+	0.4902	357	nucleus
ML31760	Chr02	66268453	66271770	+	0.2143	3318	endomembrane system
ML31779	Chr02	66094942	66095518	+	0.3865	577	nucleus
ML31790	Chr02	66035575	66035778	+	0.4853	204	extracellular space
ML31837	Chr02	65275008	65281603	+	0.3034	6596	nucleus
ML31856	Chr02	65122626	65122844	+	0.4155	219	chloroplast
ML31910	Chr02	64498213	64501977	+	0.3137	3765	nucleus	Gene duplication:ML21171
ML31925	Chr02	64319219	64322338	-	0.451	3120	chloroplast
ML31936	Chr02	64221419	64222133	+	0.4448	715	nucleus
ML32023	Chr02	63248860	63252296	+	0.3314	3437	nucleus	Gene duplication:ML11233
ML32037	Chr02	63135472	63136233	+	0.4042	762	chloroplast
ML32079	Chr02	62749199	62749609	-	0.5328	411	extracellular space
ML32096	Chr02	62559512	62560226	-	0.4741	715	organelle membrane
ML32175	Chr02	61467404	61467727	+	0.4136	324	chloroplast
ML32203	Chr02	61839008	61839397	-	0.4692	390	nucleus
ML32319	Chr08	40843289	40846879	+	0.2852	3591	chloroplast
ML32332	Chr08	40418314	40419520	+	0.483	1207	nucleus
ML32334	Chr08	40245677	40247548	+	0.5021	1872	nucleus
ML32336	Chr08	40159516	40160461	-	0.3805	946	endomembrane system
ML32354	Chr08	39853479	39853694	-	0.4398	216	nucleus
ML32379	Chr08	38826932	38827695	+	0.6296	764	chloroplast
ML32397	Chr08	37840512	37840811	-	0.3933	300	organelle membrane
ML32416	Chr08	37047220	37051111	+	0.3613	3892	chloroplast
ML32434	Chr08	36378003	36378474	+	0.4386	472	nucleus
ML32524	Chr08	33383032	33383634	-	0.4146	603	chloroplast
ML32533	Chr08	33222936	33225206	-	0.3708	2271	chloroplast
ML32589	Chr08	32094866	32095207	+	0.3392	342	extracellular space
ML32595	Chr08	31946853	31949908	-	0.3812	3056	nucleus
ML32617	Chr08	31609673	31611343	+	0.3656	1671	nucleus
ML32630	Chr08	31404525	31407637	+	0.3585	3113	plasma membrane
ML32646	Chr08	30283932	30284821	+	0.5753	890	chloroplast thylakoid lumen
ML32651	Chr08	30227562	30227888	+	0.5138	327	chloroplast
ML32690	Chr08	29463982	29466054	-	0.3468	2073	nucleus
ML32784	Chr08	27867546	27868210	-	0.4195	665	extracellular space
ML32786	Chr08	27854713	27857627	-	0.3314	2915	endomembrane system
ML32809	Chr08	27295102	27296298	-	0.3718	1197	nucleus
ML32814	Chr08	27098190	27099942	-	0.4221	1753	nucleus
ML32818	Chr08	27061319	27062366	+	0.3559	1048	extracellular space
ML32861	Chr15	1442735	1442935	-	0.4975	201	extracellular space	Gene duplication:ML32862
ML32967	Chr09	12215316	12215534	+	0.4703	219	nucleus
ML32968	Chr09	12214904	12215453	+	0.5073	550	nucleus
